# Supplementary material for: An Angle-Independent Multi-Color Display Electro-Responsive Hydrogel Film
Source: MDPI journal article supplement (doi:10.3390/gels9070568), 2023-07-12
Supplement: s1 [file s1]

## *Supporting Information*

# **An Angle-Independent Multi-Color Display Electro-Responsive Hydrogel Film**

**Huan Jiang <sup>1,2,†</sup>, Yujiao Li <sup>2,†</sup>, Fangfang Liu <sup>2</sup>, Liping Sheng <sup>1,\*</sup>, Cheng-an Tao <sup>2,\*</sup>  
and Jianfang Wang <sup>2</sup>**

<sup>1</sup> College of Chemistry and Chemical Engineering, Hunan Normal University,  
Changsha 410081, China

<sup>2</sup> College of Science, National University of Defense Technology,  
Changsha 410073, China

\* Correspondence: shenglp@hunnu.edu.cn (L.S.);  
taochengan@nudt.edu.cn (C.-a.T.)

† These authors contributed equally to this work.

**Table S1.** emulsifier SDS dosage and PS particle size

| NO. | SDS dosage (mg) | particle size (nm) | Reflective peak wavelength (nm) |
|-----|-----------------|--------------------|---------------------------------|
| 1   | 80.8            | 193                | 487.51                          |
| 2   | 70              | 210                | 522.53                          |
| 3   | 67.5            | 236                | 571.1                           |
| 4   | 59.1            | 257                | 640.52                          |

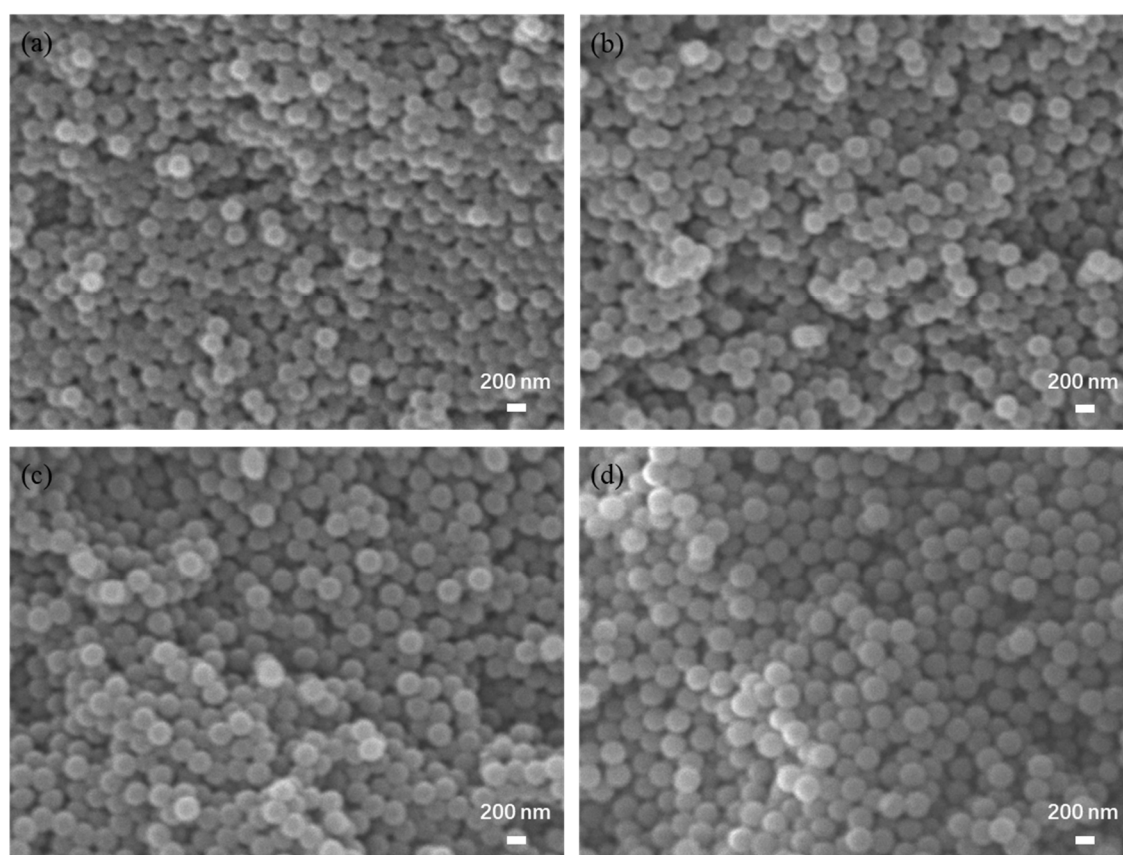

**Figure S1.** SEM images of templates assembled from PS microspheres doped with trace conductive carbon black by micro disturbance of double-sided copy paper cover. The particle sizes of the PS microspheres are (a) 193 nm, (b) 210 nm, (c) 236 nm and (d) 257 nm.

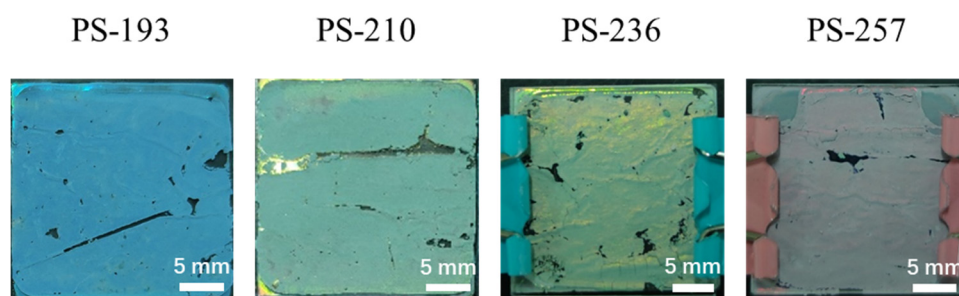

**Figure S2.** Optical photos of templates assembled from different particle sizes PS

microspheres doped with trace conductive carbon black by micro disturbance of double-sided copy paper cover.

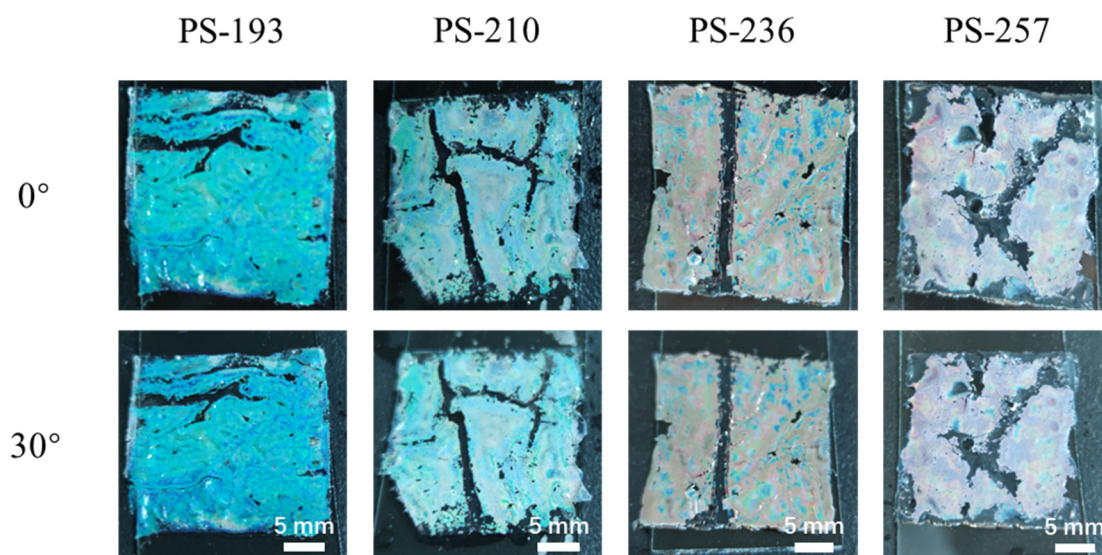

**Figure S3.** Optical photos of disordered AA-IOPG based on disordered templates assembled from different particle sizes PS microspheres doped with trace conductive carbon black by micro disturbance of double-sided copy paper cover (vertically and tilt 30°).

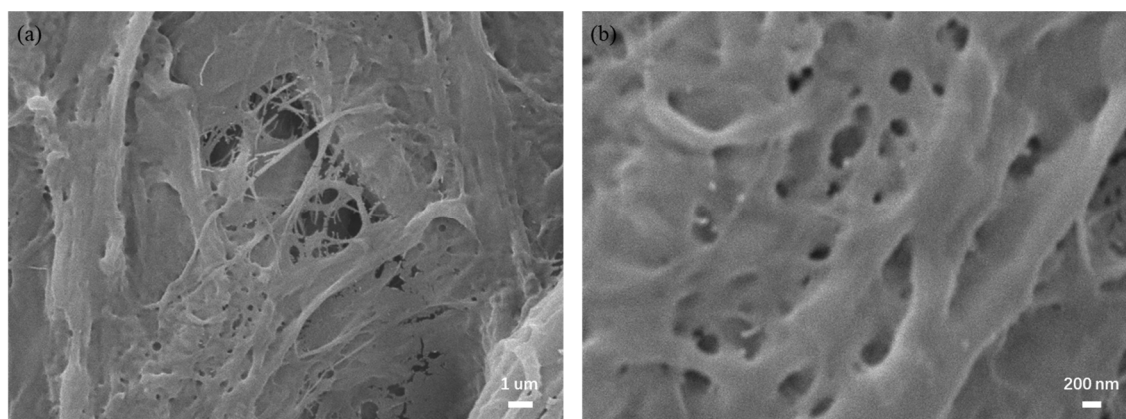

**Figure S4.** SEM images of double-sided tissue paper.

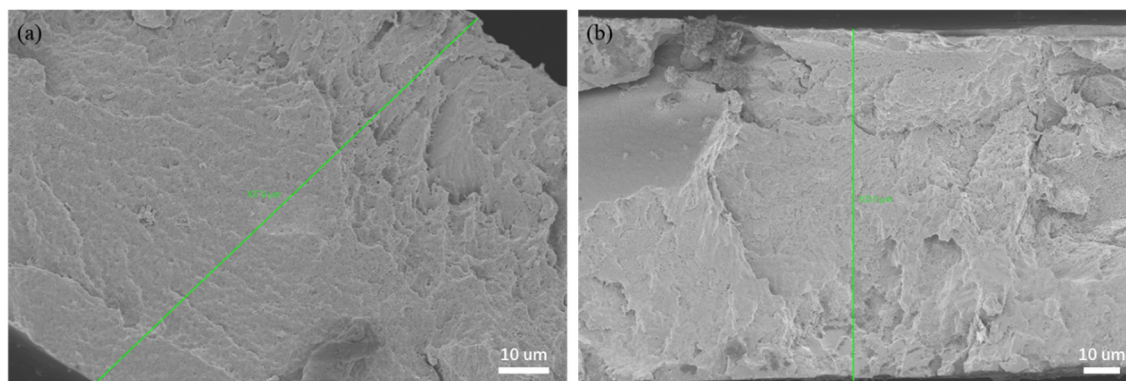

**Figure S5.** SEM image of disordered AA-IOPG organic film constructed based on 193 nm polystyrene microspheres (thickness of film ~105 μm).

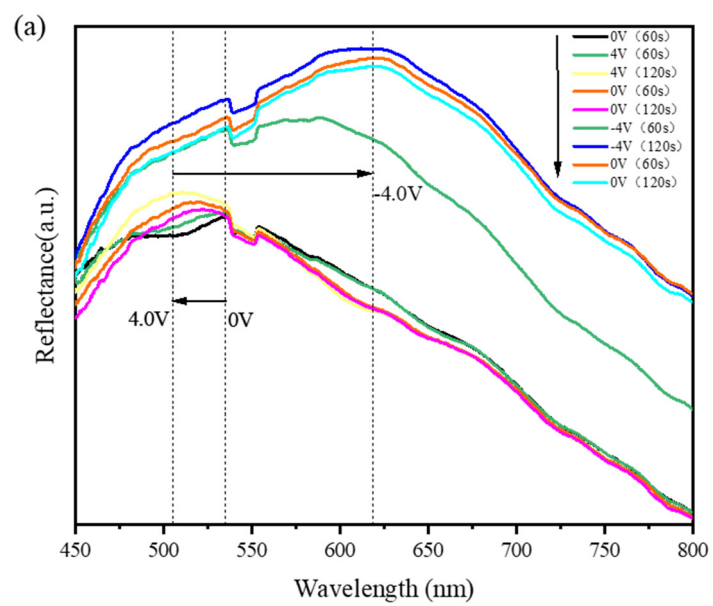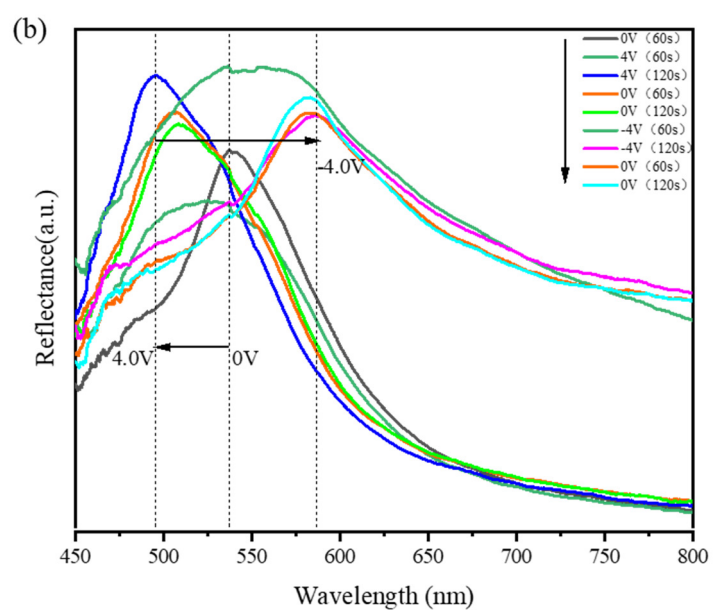

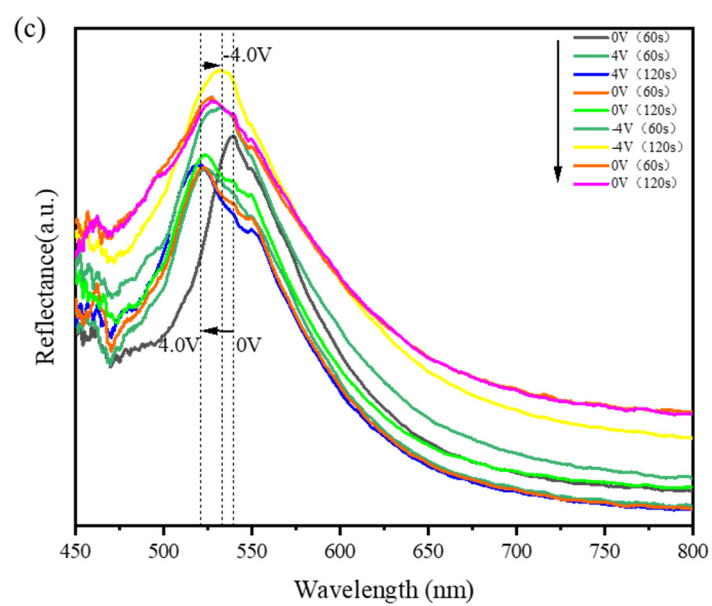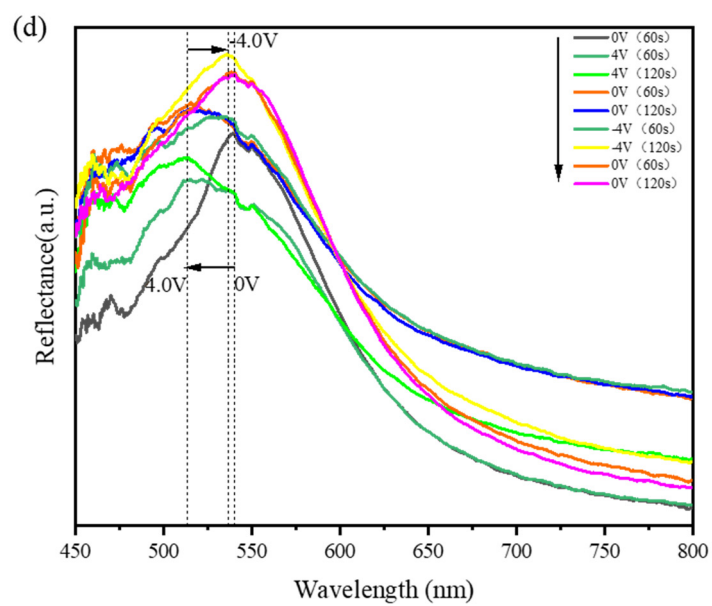

**Figure S6.** Variation of reflection spectra over time in the direction of vertical (a), tilt  $12^\circ$  (b),  $25^\circ$  (c) and  $40^\circ$  (d) with different bias voltages ( $\pm 4.0\text{V}$ ).



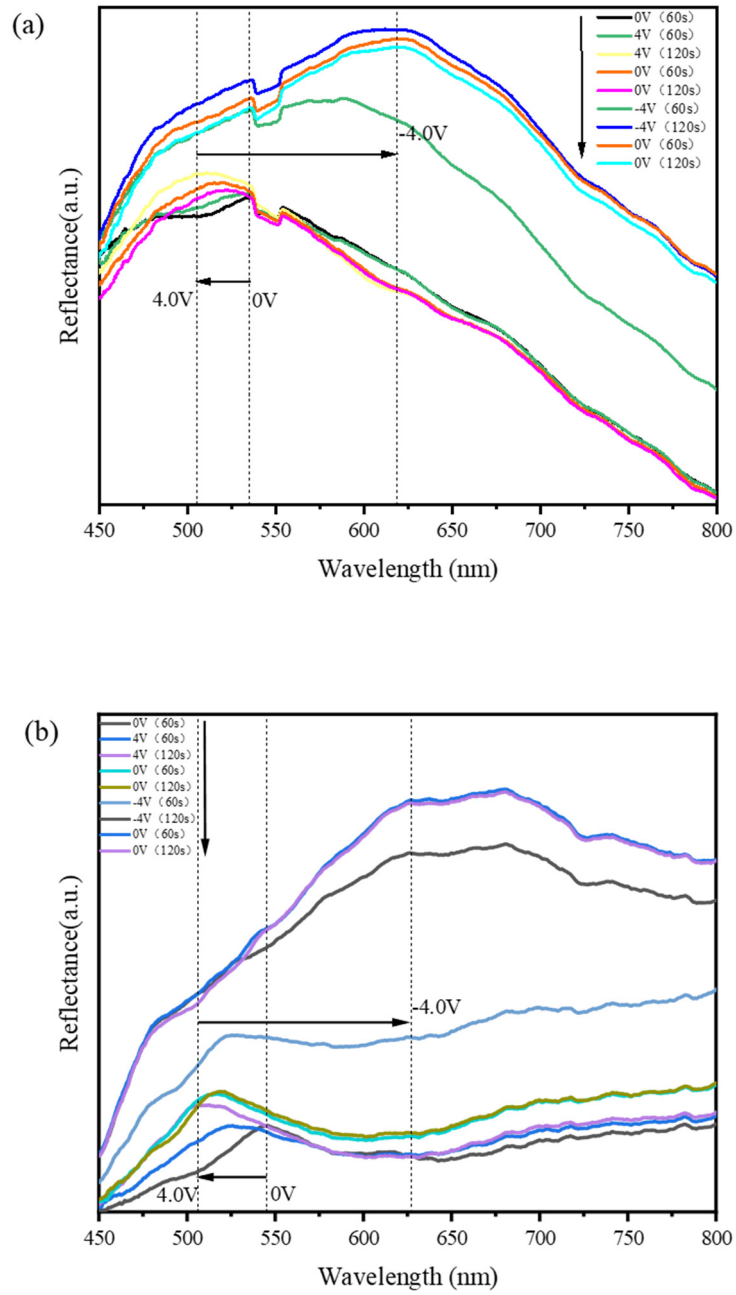

**Figure S7.** The reflection spectra over time in vertical direction of original (a) and after six months (b) of disordered AA-IOPG under different bias voltages ( $\pm 4.0\text{V}$ ).
